# Supplementary material for: Preparation of Molecularly Imprinted Microspheres as Biomimetic Recognition Material for In Situ Adsorption and Selective Chemiluminescence Determination of Bisphenol A
Source: PubMed Central journal article supplement (PMC6403925; doi:10.3390/polym10070780), 2018-07-16
Supplement: polymers-10-00780-s001.pdf [file polymers-10-00780-s001.pdf]

## Supporting Information

# Preparation of Molecularly Imprinted Microspheres as Biomimetic Recognition Material for In Situ Adsorption and Selective Chemiluminescence Determination of Bisphenol A

Yan Xiong <sup>1,2,\*</sup>, Qing Wang <sup>1</sup>, Ming Duan <sup>1,2,\*</sup>, Jing Xu <sup>3</sup>, Jie Chen <sup>1</sup> and Shenwen Fang <sup>1,2</sup>

<sup>1</sup> School of Chemistry and Chemical Engineering, Southwest Petroleum University, Chengdu 610500, China; qwang@163.com (Q.W.); jiechen92@163.com (J.C.); swhen@163.com (S.F.)

<sup>2</sup> Oil and Gas Field Applied Chemistry Key Laboratory of Sichuan Province, Southwest Petroleum University, Chengdu 610500, China

<sup>3</sup> Liaoning Entry-Exit Inspection and Quarantine Bureau, Dalian 116001, China; jingxu99@163.com

\* Correspondence: xiongyan207@163.com (Y.X.); mduan124@swpu.edu.cn (M.D.); Tel.: +86-28-83037346 (Y.X.)

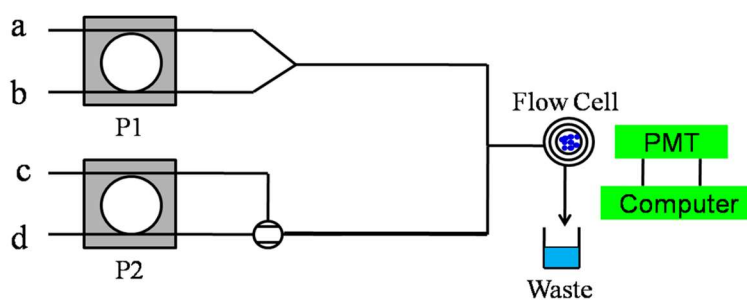

**Figure S1.** Chemiluminescence measurements flow system. a: Luminol ; b:KIO<sub>4</sub>; c:NaOH; d:BPA/H<sub>2</sub>O.

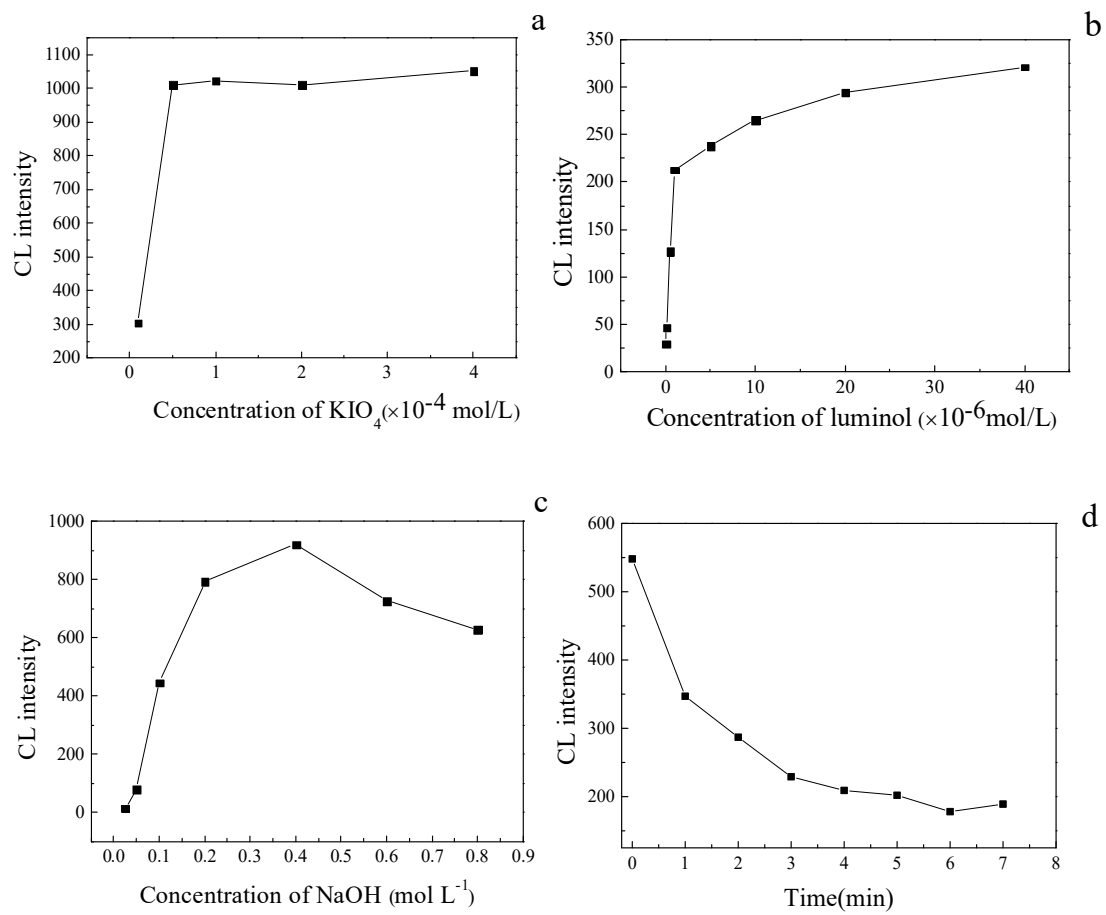

**Figure S2.** Conditions optimization for CL measurement. (a) KIO<sub>4</sub> concentration; (b) luminol concentration; (c) NaOH concentration; (d) BPA adsorption time.
